# Supplementary figures and images for: Light absorption and partitioning in Arctic Ocean surface waters: impact of multiyear ice melting
Source: Copernicus journal article supplement (doi:10.5194/bg-10-6433-2013), 2013-10-11

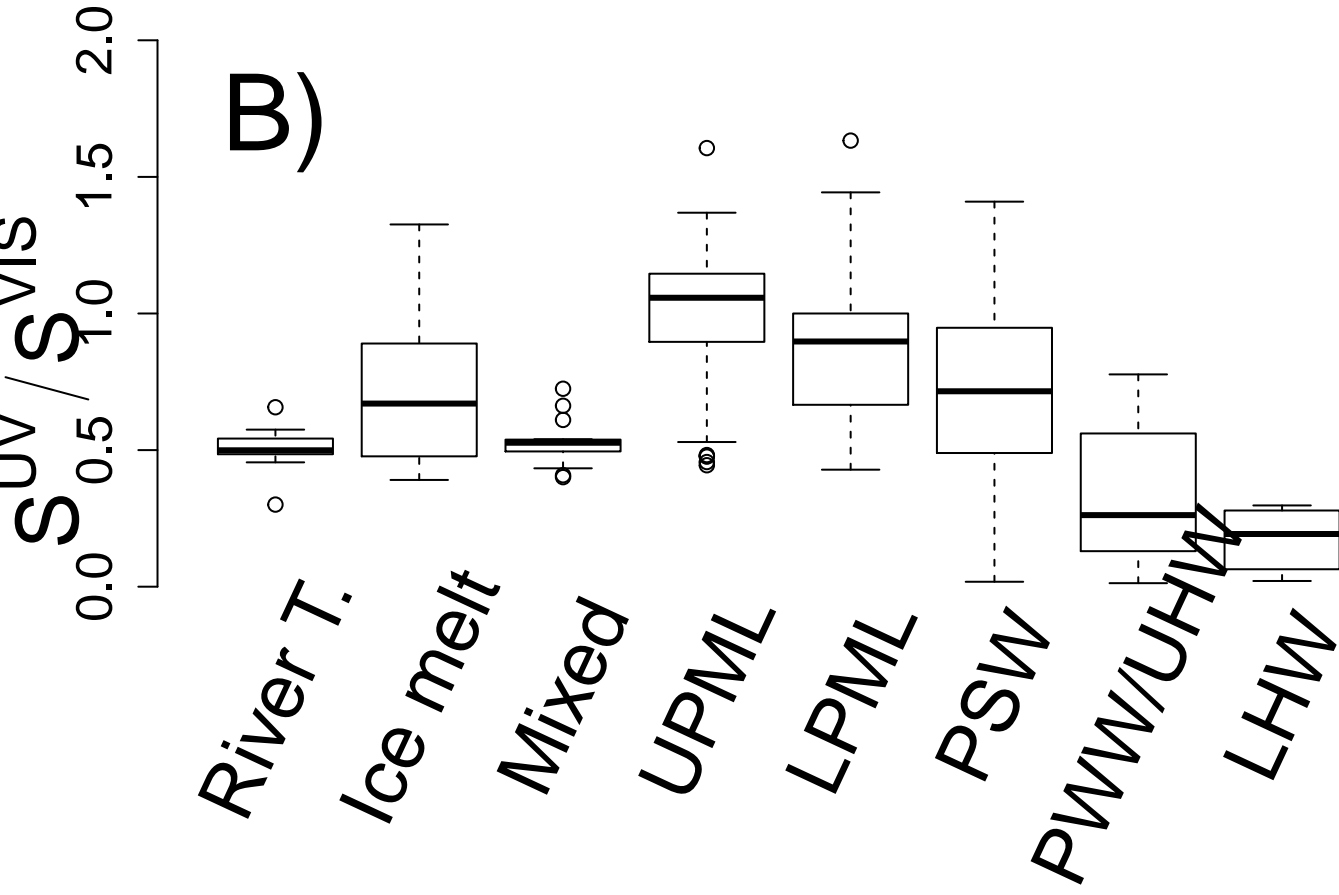

Supplement: Supplementary file 1 [file bg-10-6433-2013-supplement.zip]
